# Supplementary material for: Resuscitative endovascular balloon occlusion of the aorta (REBOA): a scoping review protocol concerning indications—advantages and challenges of implementation in traumatic non-compressible torso haemorrhage
Source: PubMed Central journal article supplement — BMJ Open. 2019 Feb 3;9(2):e027572. doi: 10.1136/bmjopen-2018-027572 (PMC6368000; doi:10.1136/bmjopen-2018-027572), 2019-02-03
Supplement: bmjopen-2018-027572.draft_revisions.pdf [file bmjopen-2018-027572.draft_revisions.pdf]

# BMJ Open

BMJ Open is committed to open peer review. As part of this commitment we make the peer review history of every article we publish publicly available.

When an article is published we post the peer reviewers' comments and the authors' responses online. We also post the versions of the paper that were used during peer review. These are the versions that the peer review comments apply to.

The versions of the paper that follow are the versions that were submitted during the peer review process. They are not the versions of record or the final published versions. They should not be cited or distributed as the published version of this manuscript.

BMJ Open is an open access journal and the full, final, typeset and author-corrected version of record of the manuscript is available on our site with no access controls, subscription charges or pay-per-view fees (<http://bmjopen.bmj.com>).

If you have any questions on BMJ Open's open peer review process please email [info.bmjopen@bmj.com](mailto:info.bmjopen@bmj.com)

# BMJ Open

## Resuscitative Endovascular Balloon Occlusion of the Aorta 'REBOA': Indications – Advantages and Challenges of Implementation in Traumatic Non-Compressible Torso Hemorrhage: A Scoping Review Protocol

|                               |                                                                                                                                                                                                                                                                                                                                                                                                                                                                                                                                                     |
|-------------------------------|-----------------------------------------------------------------------------------------------------------------------------------------------------------------------------------------------------------------------------------------------------------------------------------------------------------------------------------------------------------------------------------------------------------------------------------------------------------------------------------------------------------------------------------------------------|
| Journal:                      | <i>BMJ Open</i>                                                                                                                                                                                                                                                                                                                                                                                                                                                                                                                                     |
| Manuscript ID                 | bmjopen-2018-027572                                                                                                                                                                                                                                                                                                                                                                                                                                                                                                                                 |
| Article Type:                 | Protocol                                                                                                                                                                                                                                                                                                                                                                                                                                                                                                                                            |
| Date Submitted by the Author: | 29-Oct-2018                                                                                                                                                                                                                                                                                                                                                                                                                                                                                                                                         |
| Complete List of Authors:     | Bekdache, Omar; McGill University Health Centre, Surgery<br>Paradis, Tiffany; McGill University Faculty of Medicine<br>Shen, Yu Bai; McGill University Faculty of Medicine<br>Elbahrawy, Aly; McGill University Health Centre<br>Grushka, Jeremy; McGill University Health Centre<br>Deckelbaum, Dan; McGill University Faculty of Medicine,<br>Khwaja, Kosar; McGill University Health Centre<br>Fata, Paola; McGill University Health Centre<br>Razek, Tarek; McGill University Health Centre<br>Beckett, Andrew; McGill University Health Centre |
| Keywords:                     | TRAUMA MANAGEMENT, ACCIDENT & EMERGENCY MEDICINE,<br>Resuscitative Endovascular Balloon Occlusion of the Aorta, Damage<br>control measures in trauma, therapeutic aortic occlusion, Trauma<br>resuscitation                                                                                                                                                                                                                                                                                                                                         |
|                               |                                                                                                                                                                                                                                                                                                                                                                                                                                                                                                                                                     |

SCHOLARONE™  
Manuscripts

1  
2  
3  
4  
5  
6 **Resuscitative Endovascular Balloon Occlusion of the Aorta ‘REBOA’: Indications –**  
7  
8 **Advantages and Challenges of Implementation in Traumatic Non-Compressible**  
9  
10 **Torso Hemorrhage: A Scoping Review Protocol**  
11  
12  
13

14 Omar Bekdache <sup>1</sup> MD; Tiffany Paradis <sup>2</sup> BSc.; Yu Bai He Shen <sup>2</sup> BSc.; Aly Elbahrawy <sup>1,3</sup>  
15 MD; Jeremy Grushka <sup>1</sup> MD, MSc ; Dan L. Deckelbaum <sup>1</sup> MD, MPH ; Kosar Khwaja <sup>1</sup>  
16 MD, MSc ; Paola Fata <sup>1</sup> MD ; Tarek Razek <sup>1</sup> MD, FRCSC, FACS and Andrew Beckett <sup>1,4</sup>  
17 MD, FRCSC, MSc.  
18  
19  
20  
21  
22

23  
24 <sup>(1)</sup> Department of Trauma and Acute Surgical Care, MUHC  
25

26 <sup>(2)</sup> McGill University. Faculty of Medicine  
27

28 <sup>(3)</sup> Medical Research Institute, Alexandria University, Egypt  
29

30 <sup>(4)</sup> Royal Canadian Medical Services  
31  
32

33 Correspondence to be sent to: Omar Bekdache MD. McGill University Health Center.  
34 Montreal. Canada. (omar.bekdache@mail.mcgill.ca)  
35  
36

37  
38 **Abstract:**  
39

40 **Introduction:**  
41

42 Hemorrhage remains the leading cause of preventable death in trauma. Damage control  
43 measures applied to patients in extremis in order to control exsanguinating bleeding from  
44 non-compressible torso injuries use different techniques to limit blood flow from the  
45 Aorta to the rest of the body. Resuscitative Endovascular Balloon Occlusion of the Aorta  
46 - ‘REBOA’ - is regaining momentum recently as an adjunct measure that can provide the  
47 same results using less invasive approaches. This scoping review aims to provide a  
48  
49  
50  
51  
52  
53  
54  
55  
56  
57  
58  
59  
60

1  
2  
3 comprehensive understanding of the existing literature on REBOA. The objective is to  
4 analyze evidence and non-evidence-based medical reports and to describe current gaps in  
5 the literature about the best indication and implementation strategies for REBOA.  
6  
7  
8  
9

### 10 **Methods and Analysis:**

11  
12 Using the five-stage framework of Arksey and O'Malley's scoping review methodology  
13 as a guide, we will perform a systematic search in the following databases: MEDLINE,  
14 EMBASE, BIOSIS, COCHRANE CENTRAL, PUBMED and SCOPUS from the earliest  
15 available dates till January 15, 2018. The aim is to identify diverse studies related to the  
16 topic of REBOA. For a comprehensive search, we will explore organizational websites,  
17 key journals, and hand-search reference lists of key studies. Data will be charted and  
18 sorted using a descriptive analytical approach.  
19  
20  
21  
22  
23  
24  
25  
26  
27

### 28 **Ethics and Dissemination:**

29  
30 Ethics approval is not necessary as the data are collected from publicly available sources  
31 and there will be no consultative phase. The results will be disseminated through  
32 presentations at local, national, clinical and medical education conferences and through  
33 publication in a peer-reviewed journal.  
34  
35  
36  
37  
38  
39

40  
41 **Keywords:** Balloon occlusion of the Aorta – REBOA – therapeutic aortic occlusion -  
42  
43 Damage control measures in trauma – Trauma resuscitation  
44  
45  
46  
47  
48  
49  
50  
51  
52  
53  
54  
55  
56  
57  
58  
59  
60

## Article Summary

### **Strengths and limitations of this study**

- This scoping review is a novel review approach applied for the first time to this topic and will offer an overarching picture on the variety of clinical indications, application, and implementation of REBOA.
- Findings will have implications on researchers for recognizing the pearls, pitfalls, and contextual variations in implementation strategies.
- This review will comprise broad inclusion criteria (peer review journal and Grey literature) without assessing the quality of the articles included which gives the breadth and comprehensiveness of the research protocol while respecting the scoping review guidelines
- Findings will be limited to articles written in English
- Contacts of researchers and experts for additional complementary information will be limited

## **Introduction**

Mortality resulting from hemorrhage remains the leading cause of preventable death. In the case of an abdominal trauma with exsanguinating - life-threatening - injuries, laparotomy followed by rapid abdominal aortic clamping has been an important initial step to prevent hemorrhagic death. Recently, there has been a movement towards less invasive techniques to manage non-compressible hemorrhage, such as resuscitative endovascular balloon occlusion of the aorta (REBOA). The actual concept of endovascular aortic occlusion for transient hemorrhagic control is not new. This technique was originally reported in 1954 by Lieutenant Colonel Carl W. Hughes who performed the procedure on two critically ill soldiers <sup>1</sup>. Although both patients did not survive, the potential of its use as a resuscitative measure was proven. Later on, a study comparing REBOA to the standard method of laparotomy and abdominal aortic clamping revealed a higher survival rate amongst the REBOA group <sup>2</sup>. However, it is important to note that REBOA is not a permanent solution; rather it is a temporary hemodynamic stabilization of the patient prior to surgical management. A recent systematic review examining the outcomes of REBOA in the literature discusses the importance of a maximum aortic occlusion time of 60 minutes. This study also draws attention to the fact

1  
2  
3 that most studies report on mortality outcomes with little information on the occlusion  
4 zone and complications <sup>3</sup>.

5  
6  
7  
8 Our scoping review will provide a snapshot of the old and current, evidenced and non-  
9 evidenced based guidelines used in REBOA. It will identify empirical facts that inform  
10 researchers on the current practices of REBOA and possible gaps in knowledge. The  
11 primary objective of this research is to map the available evidence on the techniques and  
12 protocols of REBOA found in peer reviewed and Grey literature. Additionally, this  
13 scoping review will contribute to defining the challenges of implementation, as well as  
14 the clear setup of comprehensive quality indicators and competency assessment of the  
15 technique.  
16  
17  
18  
19  
20  
21  
22  
23  
24  
25  
26  
27

### 28 **Methods and Analysis:**

29  
30  
31 To the authors' best knowledge, there is no existing published evaluation of the new  
32 generation of REBOA catheter in the trauma settings, which make a scoping review  
33 interestingly pertinent to this topic area. This scoping review follows the scoping review  
34 framework developed by Arksey and O'Malley <sup>4</sup>, which has been enhanced further by  
35 Levac et al. <sup>5</sup> and Joanna Briggs Institute (JBI) <sup>6</sup>. The results will be reported following  
36 the Preferred Reporting Items for Systematic Reviews and Meta-Analysis for Protocols  
37 (PRISMA-P) guidelines <sup>7</sup>. This method includes the following five steps: (1) identifying  
38 the research question; (2) identifying relevant studies balancing breadth and  
39 comprehensiveness; (3) study selection using an iterative team approach; (4) charting the  
40 data; and (5) collating, summarizing and reporting the results as they relate to the study  
41 purpose and implications of the study findings for policy, practice, and research.  
42  
43  
44  
45  
46  
47  
48  
49  
50  
51  
52  
53  
54  
55  
56  
57  
58  
59  
60

### Stage 1- identifying the research question

Based on our described objectives, this primary review seeks to identify the following parameters:

- Benefits of REBOA – What are the clear indications, pitfalls, and advantages of its use compared to other available modalities?
- Application of REBOA – Which selective population will benefit the most from its application through comprehensively designed algorithms?
- Implementation of REBOA – What are the challenges of the adoption of the technique into the armamentarium of advanced trauma centers? Special attention will be paid to the credentialing, quality indicators, and competency assessment parameters.

In addition, emphasis will be focused on the following points:

1. Mapping the existing literature on REBOA technique
2. Identifying features needed for the successful implementation of REBOA into trauma programs
3. Clarifying the important variables necessary for the evaluation of the technique, its outcome, and its efficacy
4. Reporting the complications and long-term outcomes associated with REBOA
5. Identifying areas for future development

We hypothesized that the current literature could be categorized in order to identify critical knowledge gaps and help in guiding future research activities.

### Stage 2- Identifying relevant studies

A comprehensive review was developed with the help of an experienced health sciences



1  
2  
3 librarian at the University of McGill using specific Medical Subject Headings (MeSH)  
4 terms and keywords related to REBOA to capture the relevant literature accurately. The  
5 search strategy follows the three-step approach recommended by JBI scoping review  
6 guidelines <sup>5</sup>. The search was initially conducted using Medline electronic database and  
7 saved to ensure reproducibility of the search results (Table 1). Second, we will identify  
8 relevant related terms and keywords (“balloon occlusion”, “embolization, therapeutic”,  
9 “therapeutic occlusion”, “aorta”, “aorta occlusion”, or “artificial embolization”,  
10 combined with “resuscitation”, as well as “REBOA”). The quest will be supplemented by  
11 a vast grey literature search through Google Scholar, organizational websites of various  
12 relevant organizations, our institutional database, conference abstract or reviews to  
13 identify any related studies. Finally, we will screen the bibliography of selected articles to  
14 identify articles relevant to this scoping review. We will frequently seek feedback from  
15 our research team to refine our search strategy, and we will contact authors of relevant  
16 primary studies or reviews for further information if needed. We will also assess the  
17 quality of our search protocol using the PRESS 2015 Evidence-based checklist guidelines  
18 <sup>8</sup>. All references will be imported into an online bibliographic management program  
19 (EndNote<sup>R</sup> Library) ensuring the removal of duplicates. We will also report the search  
20 strategy for the databases in the online supplementary appendix as outlined in a Preferred  
21 Reporting Items for Systematic Reviews and Meta-Analyses (PRISMA) statement <sup>9</sup>.

### 46 **Stage 3- Study Selection:**

47  
48  
49 Two independent reviewers (TP & YB) will apply a two-step approach screening to  
50 determine the eligibility of articles according to their inclusion and exclusion criteria. The  
51 eligibility criteria will be developed in consensus by the research team and serve as a  
52  
53  
54  
55  
56  
57  
58  
59  
60

1  
2  
3 filter for relevant sources. The first step will consist of a title and abstract scan and the  
4  
5 second will entail a full-text review of all identified citations from step one. A second  
6  
7 reviewer (OB) will intervene in case of skepticism of the first reviewers about inclusion  
8  
9 eligibility of specific titles and abstracts. A sample of the retrieved articles (i.e., 20  
10  
11 percent) will be screened by the second reviewer (OB) to ensure a consistent application  
12  
13 of the eligibility criteria for inclusion in the review. Disagreements about study eligibility  
14  
15 of the sampled articles will be discussed between the three reviewers until a consensus is  
16  
17 reached and we will confer to a third reviewer (AB) if no agreement is reached.  
18  
19  
20  
21  
22  
23

#### 24 **Inclusion criteria:**

25  
26 The inclusion criteria are formulated based on the ‘Population- Intervention- Comparison  
27  
28 - Outcome (PICO)’ framework - recommended by Schardt, C et al. to improve searching  
29  
30 PubMed for clinical questions <sup>10</sup>.  
31  
32

#### 33 **Exclusion criteria:**

34  
35 The following were excluded:  
36  
37

- 38 1. Studies describing the outcomes of REBOA use in non-trauma cases.
- 39 2. Studies including pediatric cases
- 40 3. Animal studies
- 41
- 42
- 43
- 44
- 45

46 Inclusions and exclusions criteria are summarized in table 2.  
47

#### 48 **Stage 4- Data Charting**

49  
50 The research team will develop a data-charting form (Table 3). Since a scoping review  
51  
52 aims to provide a comprehensive view of the literature, data extracted from relevant  
53  
54 studies will include general information about each article such as author, publication  
55  
56  
57  
58  
59  
60

1  
2  
3 year, country, study purpose, settings, methodology, outcomes, key findings, reported  
4 challenges and limitations.  
5

6  
7  
8 In addition, we will extract information specific to areas of REBOA indication and  
9  
10 protocol implementation. Data will include the topic of the article, the type of study  
11  
12 (review, commentary, primary research), paper design and study settings. The data  
13  
14 charting form will be refined during the full-text screening to capture all pertinent  
15  
16 information from each study. Articles that meet the eligibility criteria will be organized in  
17  
18 data charting form using Microsoft Excel database. Three reviewers (TP, YB & OB) will  
19  
20 pilot the data extraction form to answer the relevant research question.  
21  
22  
23  
24  
25

### 26 **Stage 5- Synthesizing**

27  
28 The fifth stage described by Arksey and O'Malley framework<sup>8</sup> for collating and  
29  
30 summarizing data will involve a descriptive numerical summary. We will summarize the  
31  
32 quantitative data in a table outlining the overall number of studies, countries, topics, type,  
33  
34 year of publication, and study designs. Next, we will organize, stratify and analyze the  
35  
36 themes identified from all studies. Our research team will constantly refine the data  
37  
38 analysis.  
39  
40  
41  
42  
43

### 44 **Ethics and Dissemination:**

45  
46  
47 This review will be the first scoping review to examine the literature 'At Large' in  
48  
49 relation to the topic of REBOA. We anticipate that the results will identify the different  
50  
51 modalities of the application of REBOA through designated trauma centers.  
52  
53  
54  
55  
56  
57  
58  
59  
60

1  
2  
3 Ethics approval is not necessary as the data are collected from publicly available sources  
4  
5 and there will be no consultative phase. The results will be disseminated through  
6  
7 presentations at local, national, clinical and medical education conferences and through  
8  
9 publication in a peer-reviewed journal.  
10  
11  
12  
13  
14  
15  
16  
17  
18  
19  
20  
21  
22  
23  
24  
25  
26  
27  
28  
29  
30  
31  
32

### 33 References

- 34  
35  
36  
37  
38 1. Hughes LCCW. Use of an Intra-Aortic Balloon Catheter Tamponade for  
39 Controlling Intra-Abdominal Hemorrhage in Man. *Surgery*. 1954;36(65).  
40  
41  
42 2. Moore LJ, Brenner M, Kozar RA, et al. Implementation of resuscitative  
43 endovascular balloon occlusion of the aorta as an alternative to resuscitative  
44 thoracotomy for noncompressible truncal hemorrhage. *J Trauma Acute Care*  
45  
46  
47  
48  
49 *Surg*. 2015;79(4):523-530; discussion 530-522.  
50  
51  
52  
53  
54  
55  
56  
57  
58  
59  
60

- 1  
2  
3 3. Gamberini E, Coccolini F, Tamagnini B, et al. Resuscitative Endovascular  
4 Balloon Occlusion of the Aorta in trauma: a systematic review of the literature.  
5  
6 *World J Emerg Surg.* 2017;12:42.  
7  
8
- 9  
10 4. Arksey H, O'Malley L. Scoping studies: towards a methodological framework.  
11  
12 *Int J Soc Res Methodol* 2005; 8:19–32.  
13
- 14 5. Levac D, Colquhoun H, O'Brien KK. Scoping studies: advancing the  
15 methodology. *Implement Sci* 2010; 5:69.  
16  
17
- 18 6. The Joanna Briggs Institute. Joanna briggs institute reviewers' manual 2015.  
19  
20 2015 [https://joannabriggs.org/assets/docs/sumari/Reviewers- Manual\\_](https://joannabriggs.org/assets/docs/sumari/Reviewers-Manual-Methodology-for-JBI-Scoping-Reviews_2015_v2.pdf)  
21  
22 [Methodology- for- JBI- Scoping- Reviews\\_ 2015\\_ v2.pdf](https://joannabriggs.org/assets/docs/sumari/Reviewers-Manual-Methodology-for-JBI-Scoping-Reviews_2015_v2.pdf)  
23  
24  
25
- 26 7. Moher D, Liberati A, Tetzlaff J, et al. Preferred reporting items for systematic  
27 reviews and meta-analyses: the PRISMA Statement. *Open Med* 2009; 3:e123–30.  
28  
29
- 30 8. McGowan J, Sampson M, Salzwedel DM, et al. PRESS peer review of electronic  
31 search strategies: 2015 guideline statement. *J Clin Epidemiol* 2016;75:40–6. 29.  
32  
33
- 34 9. Shamseer L, Moher D, Clarke M, et al. Preferred reporting items for systematic  
35 review and meta-analysis protocols (PRISMA-P) 2015:elaboration and  
36 explanation. *BMJ* 2015; 349:g7647–g7647.  
37  
38  
39
- 40 10. Schardt, C., Adams, M.B., Owens, T. et al. Utilization of the PICO framework to  
41 improve searching PubMed for clinical questions. *BMC Medical informatics and*  
42  
43 *Decision Making.* 2007, 7:16. 1186/1472-6947.  
44  
45  
46  
47  
48  
49  
50

### **Authors' Contribution - Author Statement:**

1  
2  
3 OB, TP, YBS, and AB contributed to the project idea and the conceptual design of the  
4 protocol. OB, AE, and AB supervised the research protocol. OB, TP, YBS conducted the  
5 literature review and the search strategy. OB drafted the protocol. AE, JG, DD, PF, kk,  
6 and TR contributed to editing and supervising of the search design. All authors approved  
7 the final manuscript. AB and TR are the guarantors of the review.  
8  
9  
10  
11  
12  
13

14  
15 **Acknowledgment of additional contribution:**

16  
17 The authors would like to acknowledge the assistance of Mrs. Tara Landry - Librarian at  
18 MUHC for her remarkable help in the acquisition of the research material and to  
19 recognize the great support of the Montreal General Hospital Foundation, the McGill  
20 University Health Centre Emergency Medicine and Adult Trauma Programs. **Funding**

21  
22  
23  
24  
25  
26 **Statement:**

27  
28 This research received no specific grant from any funding agency in the public,  
29 commercial or not-for-profit sectors.  
30  
31

32  
33 **Competing / Conflicts of interest statement:**

34  
35 The research has no competing interest or any conflicts of interest to disclose.  
36  
37

38 **Word Count:** 1530  
39  
40  
41  
42  
43  
44

45 **Table 1. Search Strategy developed for MEDLINE using PICO Frame**

46  
47 Identify key concepts and provide synonyms of the following:  
48

49 Population: Resuscitative Endovascular Balloon Occlusion of the Aorta (REBOA)

50  
51 procedure data  
52

53  
54 Intervention: Data collected on the implementation of REBOA, complications, and  
55  
56  
57  
58  
59  
60

the variables used to evaluate its efficacy

Comparison: Successful REBOA performance and implementation versus non-successful

Outcomes: Identify key features needed to implement the REBOA technique, and identify important variables to collect in order to evaluate its efficacy.

**Table 2. Inclusion and exclusion criteria**

| <b>Inclusion criteria</b>                                                   | <b>Exclusion criteria</b>                                                                                             |
|-----------------------------------------------------------------------------|-----------------------------------------------------------------------------------------------------------------------|
| <i>Studies describing the implementation of REBOA at the facility level</i> | <i>Studies describing the outcomes of REBOA use in non-trauma cases such as orthopedic and post-partum hemorrhage</i> |
| <i>Studies reviewing the outcomes of REBOA use in trauma care including</i> | <i>Studies describing the use of REBOA in the setting of limb amputation or solely for orthopedic indications</i>     |
| <i>Studies describing REBOA use in trauma and emergency medicine</i>        | <i>Pediatric studies</i>                                                                                              |
| <i>Studies reporting complications of REBOA usage</i>                       | <i>Animal studies</i>                                                                                                 |
| <i>Studies reporting junctional bleeding at the groin level</i>             | <i>Elective procedures</i>                                                                                            |
| <i>Studies reporting REBOA insertion in zones one and three</i>             |                                                                                                                       |
| <i>Studies describing REBOA use in non-compressive hemorrhage</i>           |                                                                                                                       |

**Table 3. Draft Charting form**

|                       |                                                       |
|-----------------------|-------------------------------------------------------|
| Study Characteristics | First Author last name<br>Publication year<br>Country |
|-----------------------|-------------------------------------------------------|

|                        |                                                                                                                                                                                                                                                                                                                                                                                      |
|------------------------|--------------------------------------------------------------------------------------------------------------------------------------------------------------------------------------------------------------------------------------------------------------------------------------------------------------------------------------------------------------------------------------|
|                        | Topic<br>Purpose<br>Publication type<br>Study Design<br>Institutional academic status<br>Funding                                                                                                                                                                                                                                                                                     |
| Technical Analysis     | Location of insertion<br>Catheter size<br>Time to deployment<br>Artery accessed<br>Type of access<br>Guided insertion<br>Type of guidance<br>Zone of deployment<br>Imaging to confirm the position<br>Volume<br>Partial occlusion<br>Intermittent occlusion<br>Occlusion time<br>Deflation time<br>Time of sheath removal<br>Location of sheath removal<br>CFA repair<br>CFA imaging |
| Mechanism and severity | Mechanism<br>ISS – Injury Severity Score<br>Injury location<br>Type of injury<br>Subsequent surgical procedure<br>Operation Performed                                                                                                                                                                                                                                                |
| Major Outcome          | Blood and blood product use<br>Follow Up<br>Complications<br>Incidence of complications<br>Type of complications<br>Mortality<br>Cause of death                                                                                                                                                                                                                                      |



# BMJ Open

## Resuscitative Endovascular Balloon Occlusion of the Aorta 'REBOA': A Scoping Review Protocol concerning Indications – Advantages and Challenges of Implementation in Traumatic Non-Compressible Torso Hemorrhage

|                                 |                                                                                                                                                                                                                                                                                                                                                                                                                                                                                                                                                     |
|---------------------------------|-----------------------------------------------------------------------------------------------------------------------------------------------------------------------------------------------------------------------------------------------------------------------------------------------------------------------------------------------------------------------------------------------------------------------------------------------------------------------------------------------------------------------------------------------------|
| Journal:                        | <i>BMJ Open</i>                                                                                                                                                                                                                                                                                                                                                                                                                                                                                                                                     |
| Manuscript ID                   | bmjopen-2018-027572.R1                                                                                                                                                                                                                                                                                                                                                                                                                                                                                                                              |
| Article Type:                   | Protocol                                                                                                                                                                                                                                                                                                                                                                                                                                                                                                                                            |
| Date Submitted by the Author:   | 17-Dec-2018                                                                                                                                                                                                                                                                                                                                                                                                                                                                                                                                         |
| Complete List of Authors:       | Bekdache, Omar; McGill University Health Centre, Surgery<br>Paradis, Tiffany; McGill University Faculty of Medicine<br>Shen, Yu Bai; McGill University Faculty of Medicine<br>Elbahrawy, Aly; McGill University Health Centre<br>Grushka, Jeremy; McGill University Health Centre<br>Deckelbaum, Dan; McGill University Faculty of Medicine,<br>Khwaja, Kosar; McGill University Health Centre<br>Fata, Paola; McGill University Health Centre<br>Razek, Tarek; McGill University Health Centre<br>Beckett, Andrew; McGill University Health Centre |
| <b>Primary Subject Heading</b>: | Surgery                                                                                                                                                                                                                                                                                                                                                                                                                                                                                                                                             |
| Secondary Subject Heading:      | Emergency medicine, Intensive care, Surgery                                                                                                                                                                                                                                                                                                                                                                                                                                                                                                         |
| Keywords:                       | TRAUMA MANAGEMENT, ACCIDENT & EMERGENCY MEDICINE, Resuscitative Endovascular Balloon Occlusion of the Aorta, Damage control measures in trauma, therapeutic aortic occlusion, Trauma resuscitation                                                                                                                                                                                                                                                                                                                                                  |
|                                 |                                                                                                                                                                                                                                                                                                                                                                                                                                                                                                                                                     |

SCHOLARONE™  
Manuscripts

1  
2  
3  
4  
5  
6 **Resuscitative Endovascular Balloon Occlusion of the Aorta ‘REBOA’: A**  
7  
8 **Scoping Review Protocol concerning Indications – Advantages and Challenges of**  
9  
10 **Implementation in Traumatic Non-Compressible Torso Hemorrhage**  
11  
12  
13

14 Omar Bekdache <sup>1</sup> MD; Tiffany Paradis <sup>2</sup> BSc.; Yu Bai He Shen <sup>2</sup> BSc.; Aly  
15 Elbahrawy <sup>1,3</sup> MD; Jeremy Grushka <sup>1</sup> MD, MSc ; Dan L. Deckelbaum <sup>1</sup> MD, MPH ;  
16  
17 Kosar Khwaja <sup>1</sup> MD, MSc ; Paola Fata <sup>1</sup> MD ; Tarek Razek <sup>1</sup> MD, FRCSC, FACS and  
18  
19 Andrew Beckett <sup>1,4</sup> MD, FRCSC, MSc.  
20  
21

22  
23  
24 (1) Department of Trauma and Acute Surgical Care, MUHC  
25

26 (2) McGill University. Faculty of Medicine  
27

28 (3) Medical Research Institute, Alexandria University, Egypt  
29

30 (4) Royal Canadian Medical Services  
31  
32  
33

34  
35 Omar Bekdache: [omar.bekdache@mail.mcgill.ca](mailto:omar.bekdache@mail.mcgill.ca)  
36

37 Tiffany Paradis: [tiffany.paradis@mail.mcgill.ca](mailto:tiffany.paradis@mail.mcgill.ca)  
38

39 Yu bai He Shen: [yu.b.shen@mail.mcgill.ca](mailto:yu.b.shen@mail.mcgill.ca)  
40

41 Aly Elbahrawy: [aly.elbahrawy@mail.mcgill.ca](mailto:aly.elbahrawy@mail.mcgill.ca)  
42

43 Jeremy Grushka: [jeremy.grushka@mcgill.ca](mailto:jeremy.grushka@mcgill.ca)  
44

45 Dan Deckelbaum: [dan.deckelbaum@mcgill.ca](mailto:dan.deckelbaum@mcgill.ca)  
46

47 Kosar Khwaja: [dr.k.khwaja@mcgill.ca](mailto:dr.k.khwaja@mcgill.ca)  
48

49 Paola Fata: [paola.fata@mcgill.ca](mailto:paola.fata@mcgill.ca)  
50

51 Tarek Razek: [tarek.razek@mcgill.ca](mailto:tarek.razek@mcgill.ca)  
52

53 Andrew Beckett: [andrew.beckett@mcgill.ca](mailto:andrew.beckett@mcgill.ca)  
54  
55  
56  
57  
58  
59  
60

1  
2  
3 Correspondence to be sent to:  
4

5 Omar Bekdache MD  
6

7  
8 1650 Cedar Avenue.  
9

10 Montreal General Hospital.  
11

12 H3G1A4  
13

14 McGill University Health Center.  
15

16  
17 Montreal, Canada. (omar.bekdache@mail.mcgill.ca)  
18  
19

20  
21 **Abstract:**  
22

23  
24 **Introduction:**  
25

26 Hemorrhage remains the leading cause of preventable death in trauma. Damage  
27 control measures applied to patients in extremis in order to control exsanguinating  
28 bleeding from non-compressible torso injuries use different techniques to limit blood  
29 flow from the Aorta to the rest of the body. Resuscitative Endovascular Balloon  
30 Occlusion of the Aorta - 'REBOA' - is regaining momentum recently as an adjunct  
31 measure that can provide the same results using less invasive approaches. This  
32 scoping review aims to provide a comprehensive understanding of the existing  
33 literature on REBOA. The objective is to analyze evidence and non-evidence-based  
34 medical reports and to describe current gaps in the literature about the best indication  
35 and implementation strategies for REBOA.  
36  
37  
38  
39  
40  
41  
42  
43  
44  
45  
46  
47  
48

49 **Methods and Analysis:**  
50

51 Using the five-stage framework of Arksey and O'Malley's scoping review  
52 methodology as a guide, we will perform a systematic search in the following  
53 databases: MEDLINE, EMBASE, BIOSIS, COCHRANE CENTRAL, PUBMED and  
54 SCOPUS from the earliest available publications. The aim is to identify diverse  
55  
56  
57  
58  
59  
60

1  
2  
3 studies related to the topic of REBOA. For a comprehensive search, we will explore  
4  
5 organizational websites, key journals, and hand-search reference lists of key studies.  
6

7  
8 Data will be charted and sorted using a descriptive analytical approach.  
9

10 **Ethics and Dissemination:**

11  
12 Ethics approval is not necessary as the data are collected from publicly available  
13  
14 sources and there will be no consultative phase. The results will be disseminated  
15  
16 through presentations at local, national, clinical and medical education conferences  
17  
18 and through publication in a peer-reviewed journal.  
19  
20

21  
22 **Keywords:** Balloon occlusion of the Aorta – REBOA – therapeutic aortic occlusion -  
23  
24 Damage control measures in trauma – Trauma resuscitation  
25  
26  
27  
28  
29  
30  
31  
32  
33  
34  
35  
36  
37  
38  
39  
40  
41  
42  
43  
44  
45  
46  
47  
48  
49  
50  
51  
52  
53  
54  
55  
56  
57  
58  
59  
60

## **Article Summary**

### **Strengths and limitations of this study**

- This scoping review is a novel review approach applied for the first time to this topic and will offer an overarching picture on the variety of clinical indications, application, and implementation of REBOA.
- Findings will have implications on researchers for recognizing the pearls, pitfalls, and contextual variations in implementation strategies.
- This review will comprise broad inclusion criteria (peer review journal and Grey literature) without assessing the quality of the articles included, which gives the breadth and comprehensiveness of the research protocol while respecting the scoping review guidelines
- Scoping reviews are primarily descriptive in nature, and therefore quantitative data analyses are considered to be one of the relevant limitations
- Findings will be limited to articles written in English
- Contacts of researchers and experts for additional complementary information will be limited

## **Introduction**

Mortality resulting from hemorrhage remains the leading cause of preventable death. In the case of an abdominal trauma with exsanguinating - life-threatening - injuries, laparotomy followed by rapid abdominal aortic clamping has been an important initial step to prevent hemorrhagic death. Recently, there has been a movement towards less invasive techniques to manage non-compressible hemorrhage, such as resuscitative endovascular balloon occlusion of the aorta (REBOA). The actual concept of endovascular aortic occlusion for transient hemorrhagic control is not new. This technique was originally reported in 1954 by Lieutenant Colonel Carl W. Hughes who performed the procedure on two critically ill soldiers <sup>1</sup>. Although both patients did not survive, the potential of its use as a resuscitative measure was proven. Later on, a study comparing REBOA to the standard method of laparotomy and abdominal aortic clamping revealed a higher survival rate amongst the REBOA group <sup>2</sup>. However, it is important to note that REBOA is not a permanent solution; rather it is a temporary hemodynamic stabilization of the patient prior to surgical management. A recent systematic review examining the outcomes of REBOA in the literature discusses the importance of a maximum aortic occlusion time of 60 minutes. This study also draws attention to the fact that most studies report on mortality outcomes with little information on the occlusion zone and complications <sup>3</sup>.

Our scoping review will provide a snapshot of the old and current, evidenced and non-evidenced based guidelines used in REBOA. It will identify empirical facts that inform researchers on the current practices of REBOA and possible gaps in knowledge. The primary objective of this research is to map the available evidence on the techniques and protocols of REBOA found in peer reviewed and Grey literature. Additionally, this scoping review will contribute to defining the challenges

1  
2  
3 of implementation, as well as the clear setup of comprehensive quality indicators and  
4  
5 competency assessment of the technique.  
6

## 7 **Methods and Analysis:**

### 8 Patient and public involvement:

9  
10  
11 Patients and/or public were not involved in this study. The results will be  
12  
13 disseminated through presentations at local, national, clinical and medical education  
14  
15 conferences and through publication in a peer-reviewed journal.  
16  
17

18  
19 To the authors' best knowledge, there is no existing published evaluation of the new  
20  
21 generation of REBOA catheter in the trauma settings, which make a scoping review  
22  
23 interestingly pertinent to this topic area. We will perform a systematic search in the  
24  
25 following databases: MEDLINE, EMBASE, BIOSIS, COCHRANE CENTRAL,  
26  
27 PUBMED and SCOPUS from the earliest available publications. Start date of data  
28  
29 collection was January 2018. End date of the study is November 2018.. This scoping  
30  
31 review follows the scoping review framework developed by Arksey and O'Malley <sup>4</sup>,  
32  
33 which has been enhanced further by Levac et al. <sup>5</sup> and Joanna Briggs Institute (JBI) <sup>6</sup>.  
34  
35 The results will be reported following the Preferred Reporting Items for Systematic  
36  
37 Reviews and Meta-Analysis for Protocols (PRISMA-P) guidelines <sup>7</sup>. This method  
38  
39 includes the following five steps: (1) identifying the research question; (2) identifying  
40  
41 relevant studies balancing breadth and comprehensiveness; (3) study selection using  
42  
43 an iterative team approach; (4) charting the data; and (5) collating, summarizing and  
44  
45 reporting the results as they relate to the study purpose and implications of the study  
46  
47 findings for policy, practice, and research.  
48  
49  
50  
51  
52

### 53 **Stage 1- identifying the research question**

54  
55 Based on our described objectives, this primary review seeks to identify the following  
56  
57 parameters:  
58  
59  
60

- 1
- 2
- 3 • Benefits of REBOA – What are the clear indications, pitfalls, and advantages
- 4 of its use compared to other available modalities?
- 5
- 6
- 7
- 8 • Application of REBOA – Which selective population will benefit the most
- 9 from its application through comprehensively designed algorithms?
- 10
- 11
- 12 • Implementation of REBOA – What are the challenges of the adoption of the
- 13 technique into the armamentarium of advanced trauma centers? Special
- 14 attention will be paid to the credentialing, quality indicators, and competency
- 15 assessment parameters.
- 16
- 17
- 18
- 19
- 20
- 21

22 In addition, emphasis will be focused on the following points:

- 23 1. Mapping the existing literature on REBOA technique
- 24
- 25 2. Identifying features needed for the successful implementation of REBOA into
- 26 trauma programs
- 27
- 28 3. Clarifying the important variables necessary for the evaluation of the
- 29 technique, its outcome, and its efficacy
- 30
- 31 4. Reporting the complications and long-term outcomes associated with REBOA
- 32
- 33 5. Identifying areas for future development
- 34
- 35
- 36
- 37
- 38
- 39

40 We hypothesized that the current literature could be categorized in order to identify

41 critical knowledge gaps and help in guiding future research activities.

42

43

44

#### 45 **Stage 2- Identifying relevant studies**

46 A comprehensive review was developed with the help of an experienced health

47 sciences librarian at the University of McGill using specific Medical Subject

48 Headings (MeSH) terms and keywords related to REBOA to capture the relevant

49 literature accurately. The search strategy follows the three-step approach

50 recommended by JBI scoping review guidelines<sup>5</sup>. The search was initially conducted

51 using Medline electronic database and saved to ensure reproducibility of the search

52

53

54

55

56

57

58

59

60



1  
2  
3 results (Table 1). Second, we identified relevant related terms and keywords (“balloon  
4 occlusion”, “embolization, therapeutic”, “therapeutic occlusion”, “aorta”, “aorta  
5 occlusion”, or “artificial embolization”, combined with “resuscitation”, as well as  
6  
7  
8  
9  
10 “REBOA”). The quest will be supplemented by a vast grey literature search through  
11  
12 Google Scholar, organizational websites of various relevant organizations, our  
13  
14 institutional database, conference abstract or reviews to identify any related studies.  
15  
16 Finally, we will screen the bibliography of selected articles to identify articles  
17  
18 relevant to this scoping review. We will frequently seek feedback from our research  
19  
20 team to refine our search strategy, and we will contact authors of relevant primary  
21  
22 studies or reviews for further information if needed. We will also assess the quality of  
23  
24 our search protocol using the PRESS 2015 Evidence-based checklist guidelines <sup>8</sup>. All  
25  
26 references will be imported into an online bibliographic management program  
27  
28 (EndNote<sup>R</sup> Library) ensuring the removal of duplicates. We will report the search  
29  
30 strategy for the databases as outlined in the Preferred Reporting Items for Systematic  
31  
32 Reviews and Meta-Analyses (PRISMA) statement <sup>9</sup>.  
33  
34  
35  
36  
37  
38  
39

### 40 **Stage 3- Study Selection:**

41  
42 Two independent reviewers (TP & YB) will apply a two-step approach screening to  
43  
44 determine the eligibility of articles according to their inclusion and exclusion criteria.  
45  
46 The eligibility criteria will be developed in consensus by the research team and serve  
47  
48 as a filter for relevant sources. The first step will consist of a title and abstract scan  
49  
50 and the second will entail a full-text review of all identified citations from step one.  
51  
52 A second reviewer (OB) will intervene in case of skepticism of the first reviewers  
53  
54 about inclusion eligibility of specific titles and abstracts. A sample of the retrieved  
55  
56 articles (i.e., 20 percent) will be screened by the second reviewer (OB) to ensure a  
57  
58  
59  
60

1  
2  
3 consistent application of the eligibility criteria for inclusion in the review.  
4  
5 Disagreements about study eligibility of the sampled articles will be discussed  
6  
7 between the three reviewers until a consensus is reached and we will confer to a third  
8  
9 reviewer (AB) if no agreement is reached.  
10

### 11 **Inclusion criteria:**

12  
13 The inclusion criteria are formulated based on the 'Population- Intervention-  
14  
15 Comparison - Outcome (PICO)' framework - recommended by Schardt, C et al. to  
16  
17 improve searching PubMed for clinical questions <sup>10</sup>.  
18  
19

### 20 **Exclusion criteria:**

21  
22 The following were excluded:  
23

- 24 1. Cadaveric studies
  - 25 2. Animal studies
- 26  
27  
28  
29  
30  
31

32 Inclusions and exclusions criteria are summarized in table 2.  
33

### 34 **Stage 4- Data Charting**

35  
36 The research team will develop a data-charting form (Table 3). Since a scoping  
37  
38 review aims to provide a comprehensive view of the literature, data extracted from  
39  
40 relevant studies will include general information about each article such as author,  
41  
42 publication year, country, study purpose, settings, methodology, outcomes, key  
43  
44 findings, reported challenges and limitations.  
45  
46

47  
48 In addition, we will extract information specific to areas of REBOA indication and  
49  
50 protocol implementation. Data will include the topic of the article, the type of study  
51  
52 (review, commentary, primary research), paper design and study settings. The data  
53  
54 charting form will be refined during the full-text screening to capture all pertinent  
55  
56 information from each study. Articles that meet the eligibility criteria will be  
57  
58 organized in data charting form using Microsoft Excel database. Three reviewers (TP,  
59  
60

1  
2  
3 YB & OB) will pilot the data extraction form to answer the relevant research  
4  
5 question.  
6  
7

### 8 **Stage 5- Synthesizing**

9

10 The fifth stage described by Arksey and O'Malley framework<sup>8</sup> for collating and  
11 summarizing data will involve a descriptive numerical summary. We will summarize  
12 the quantitative data in a table outlining the overall number of studies, countries,  
13 the quantitative data in a table outlining the overall number of studies, countries,  
14 topics, type, year of publication, and study designs. Next, we will organize, stratify  
15 and analyze the themes identified from all studies. Our research team will constantly  
16 refine the data analysis.  
17  
18  
19  
20  
21  
22

### 23 **Ethics and Dissemination:**

24

25 This review will be the first scoping review to examine the literature 'At Large' in  
26 relation to the topic of REBOA. We anticipate that the results will identify the  
27 different modalities of the application of REBOA through designated trauma centers.  
28  
29

30 Ethics approval is not necessary as the data are collected from publicly available  
31 sources and there will be no consultative phase. The results will be disseminated  
32 through presentations at local, national, clinical and medical education conferences  
33 and through publication in a peer-reviewed journal.  
34  
35  
36  
37  
38  
39  
40  
41  
42  
43  
44  
45  
46  
47  
48  
49  
50  
51  
52  
53  
54  
55  
56  
57  
58  
59  
60

## References

1. Hughes LCCW. Use of an Intra-Aortic Balloon Catheter Tamponade for Controlling Intra-Abdominal Hemorrhage in Man. *Surgery*. 1954;36(65).
2. Moore LJ, Brenner M, Kozar RA, et al. Implementation of resuscitative endovascular balloon occlusion of the aorta as an alternative to resuscitative thoracotomy for noncompressible truncal hemorrhage. *J Trauma Acute Care Surg*. 2015;79(4):523-530; discussion 530-522.
3. Gamberini E, Coccolini F, Tamagnini B, et al. Resuscitative Endovascular Balloon Occlusion of the Aorta in trauma: a systematic review of the literature. *World J Emerg Surg*. 2017;12:42.
4. Arksey H, O'Malley L. Scoping studies: towards a methodological framework. *Int J Soc Res Methodol* 2005; 8:19–32.
5. Levac D, Colquhoun H, O'Brien KK. Scoping studies: advancing the methodology. *Implement Sci* 2010; 5:69.
6. The Joanna Briggs Institute. Joanna briggs institute reviewers' manual 2015. 2015 [https://joannabriggs.org/assets/docs/sumari/Reviewers-Manual-Methodology-for-JBI-Scoping-Reviews\\_2015\\_v2.pdf](https://joannabriggs.org/assets/docs/sumari/Reviewers-Manual-Methodology-for-JBI-Scoping-Reviews_2015_v2.pdf)
7. Moher D, Liberati A, Tetzlaff J, et al. Preferred reporting items for systematic reviews and meta-analyses: the PRISMA Statement. *Open Med* 2009; 3:e123–30.
8. McGowan J, Sampson M, Salzwedel DM, et al. PRESS peer review of electronic search strategies: 2015 guideline statement. *J Clin Epidemiol* 2016;75:40–6. 29.
9. Shamseer L, Moher D, Clarke M, et al. Preferred reporting items for

1  
2  
3 systematic review and meta-analysis protocols (PRISMA-P) 2015:elaboration  
4 and explanation. BMJ 2015; 349:g7647–g7647.  
5  
6

- 7  
8 10. Schardt, C., Adams, M.B., Owens, T. et al. Utilization of the PICO  
9 framework to improve searching PubMed for clinical questions. BMC  
10 Medical informatics and Decision Making. 2007, 7:16. 1186/1472-6947.  
11  
12  
13  
14  
15  
16

17 **Authors' Contribution - Author Statement:**

18  
19 OB, TP, YBS, and AB contributed to the project idea and the conceptual design of the  
20 protocol. OB, AE, and AB supervised the research protocol. OB, TP, YBS conducted  
21 the literature review and the search strategy. OB drafted the protocol. AE, JG, DD,  
22 PF, kk, and TR contributed to editing and supervising of the search design. All  
23 authors approved the final manuscript. AB and TR are the guarantors of the review.  
24  
25  
26  
27  
28  
29

30 **Acknowledgment of additional contribution:**

31  
32  
33 The authors would like to acknowledge the assistance of Mrs. Tara Landry -  
34 Librarian at MUHC for her remarkable help in the acquisition of the research material  
35 and to recognize the great support of the Montreal General Hospital Foundation, the  
36 McGill University Health Centre Emergency Medicine and Adult Trauma Programs.  
37  
38  
39  
40  
41

42 **Funding Statement:**

43  
44 This research received no specific grant from any funding agency in the public,  
45 commercial or not-for-profit sectors.  
46  
47  
48

49 **Competing / Conflicts of interest statement:**

50  
51 The research has no competing interest or any conflicts of interest to disclose.  
52  
53

54 **Word Count:** 1605  
55  
56  
57  
58  
59  
60

**Table 1. Search Strategy developed for MEDLINE using PICO Frame**

Identify key concepts and provide synonyms of the following:

|                                                                                                                                                                |
|----------------------------------------------------------------------------------------------------------------------------------------------------------------|
| <u>Population:</u> Resuscitative Endovascular Balloon Occlusion of the Aorta (REBOA) procedure data                                                            |
| <u>Intervention:</u> Data collected on the implementation of REBOA, complications, and the variables used to evaluate its efficacy                             |
| <u>Comparison:</u> Successful REBOA performance and implementation versus non-successful                                                                       |
| <u>Outcomes:</u> Identify key features needed to implement the REBOA technique, and identify important variables to collect in order to evaluate its efficacy. |

**Table 2. Inclusion and exclusion criteria**

| <b>Inclusion criteria</b>                                            | <b>Exclusion criteria</b> |
|----------------------------------------------------------------------|---------------------------|
| Studies describing the implementation of REBOA at the facility level | Cadaveric studies         |
| Studies reviewing the outcomes of REBOA use in trauma care including | Animal studies            |
| Studies describing REBOA use in trauma and emergency medicine        |                           |
| Studies reporting complications of REBOA usage                       |                           |
| Studies reporting junctional bleeding at the groin level             |                           |
| Studies reporting REBOA insertion in zones one and three             |                           |
| Studies describing REBOA use in non-compressive hemorrhage           |                           |

**Table 3. Draft Charting form**

|                        |                                                                                                                                                                                                                                                                                                                                                                                                                                                                                                                  |
|------------------------|------------------------------------------------------------------------------------------------------------------------------------------------------------------------------------------------------------------------------------------------------------------------------------------------------------------------------------------------------------------------------------------------------------------------------------------------------------------------------------------------------------------|
| Study Characteristics  | First Author last name<br>Publication year<br>Country<br>Topic<br>Purpose<br>Publication type<br>Study Design<br>Institutional academic status<br>Funding                                                                                                                                                                                                                                                                                                                                                        |
| Technical Analysis     | Location of insertion<br>Catheter size<br>Time to deployment<br>Artery accessed<br>Type of access<br>Guided insertion<br>Type of guidance<br>Zone of deployment<br>Imaging to confirm the position<br>Volume<br>Partial occlusion<br>Intermittent occlusion<br>Occlusion time<br>Deflation time<br>Time of sheath removal<br>Location of sheath removal<br>CFA repair<br>CFA imaging<br>Training level of performer<br>Accredited course vs. peer training<br>Credentials of performer<br>Specialty of performer |
| Mechanism and severity | Mechanism<br>ISS – Injury Severity Score<br>Injury location<br>Type of injury<br>Subsequent surgical procedure<br>Operation Performed                                                                                                                                                                                                                                                                                                                                                                            |
| Major Outcome          | Blood and blood product use<br>Follow Up<br>Complications<br>Incidence of complications<br>Type of complications<br>Mortality<br>Cause of death                                                                                                                                                                                                                                                                                                                                                                  |

1  
2  
3  
4  
5  
6  
7  
8  
9  
10  
11  
12  
13  
14  
15  
16  
17  
18  
19  
20  
21  
22  
23  
24  
25  
26  
27  
28  
29  
30  
31  
32  
33  
34  
35  
36  
37  
38  
39  
40  
41  
42  
43  
44  
45  
46  
47  
48  
49  
50  
51  
52  
53  
54  
55  
56  
57  
58  
59  
60

For peer review only
